# Supplementary material
Source: PubMed Central journal article supplement (PMC9883788)
Supplement: NIHMS1805124-supplement-1.pdf [file NIHMS1805124-supplement-1.pdf]

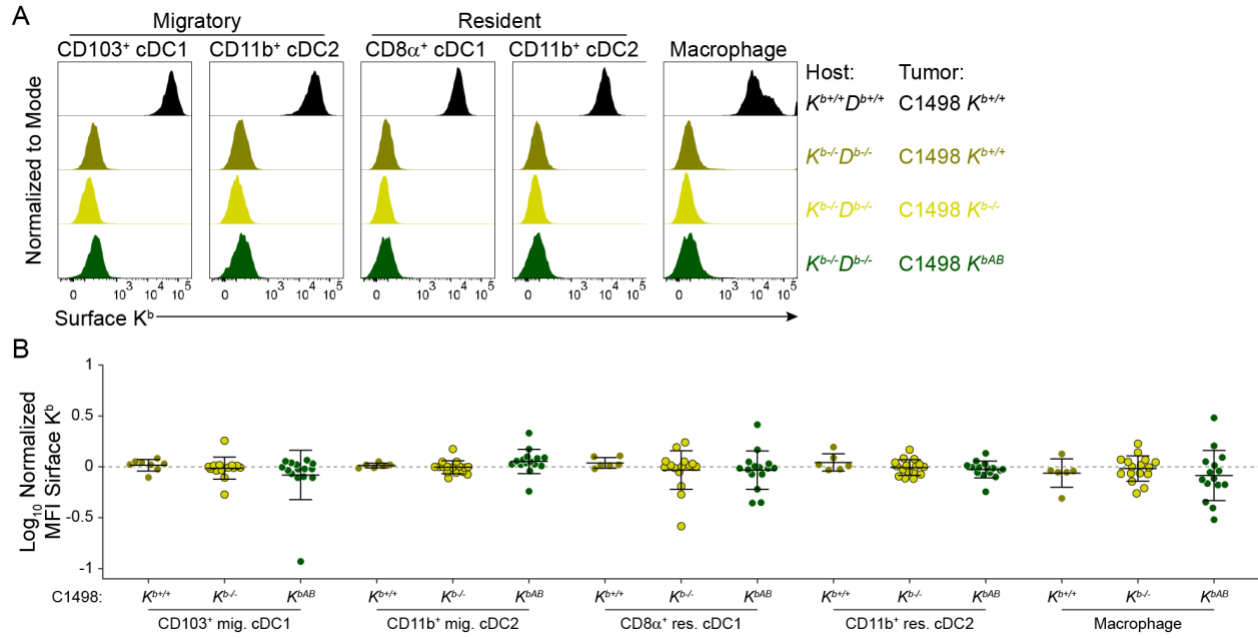

**Supplemental Figure S1 (related to Figure 4): C1498-derived  $K^b$  molecules are not detected on the surface of tdLN APCs by flow cytometry. A and B) Surface staining for  $K^b$  on tdLN APCs from  $K^{b-/-}D^{b-/-}$  mice bearing C1498  $K^{b+/+}$  ( $n = 6$ ),  $K^{b-/-}$  ( $n = 16$ ), and  $K^{bAB}$  ( $n = 15$ ) tumors at day 6-10. Representative flow cytometry histograms (A) and data quantification (B) are shown. Data are pooled from four independent experiments and depicted as mean  $\pm$  s.d. Statistical significance was determined by two-way ANOVA with post-hoc Tukey's HSD test.**

A

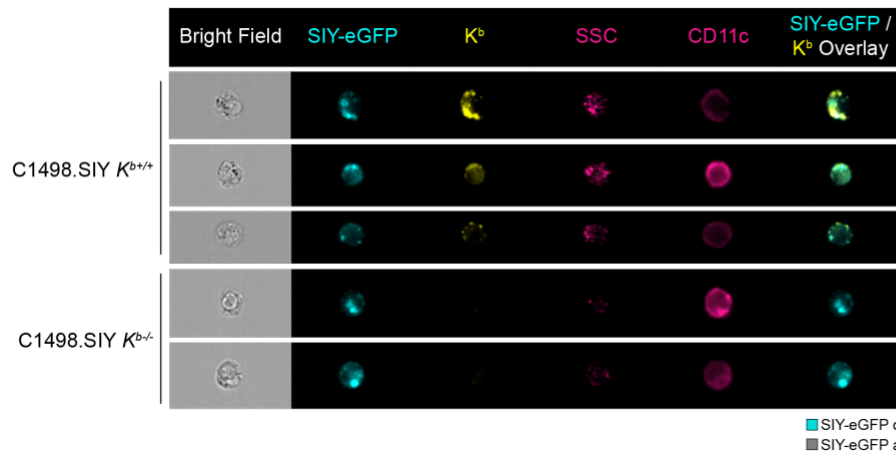

B

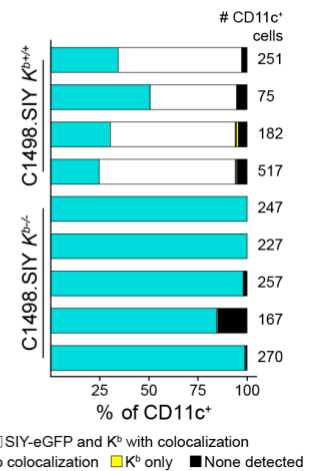

**Supplemental Figure S2 (Related to Figure 4): Correlation between acquisition of tumor-derived  $K^b$  molecules and internalization of a fluorescent tumor antigen.**  $CD11c^+$  APCs isolated from 7-day C1498.SIY  $K^{b+/+}$  or  $K^{b-/-}$  tumors in  $K^{b-/-}D^{b-/-}$  mice were analyzed by imaging flow cytometry. **A)** Representative images of  $CD11c^+$  APCs showing internalization of model tumor antigen (SIY-eGFP) and acquisition of tumor-derived  $K^b$  molecules by intracellular antibody stain. **B)** Summary bar graph of the data. Each bar represents one mouse, and the number of  $CD11c^+$  APCs imaged is indicated to the right. Three samples were excluded from the quantification because fewer than 50  $CD11c^+$  APCs were imaged in focus. Data shown are from one experiment, representative of two independent experiments.

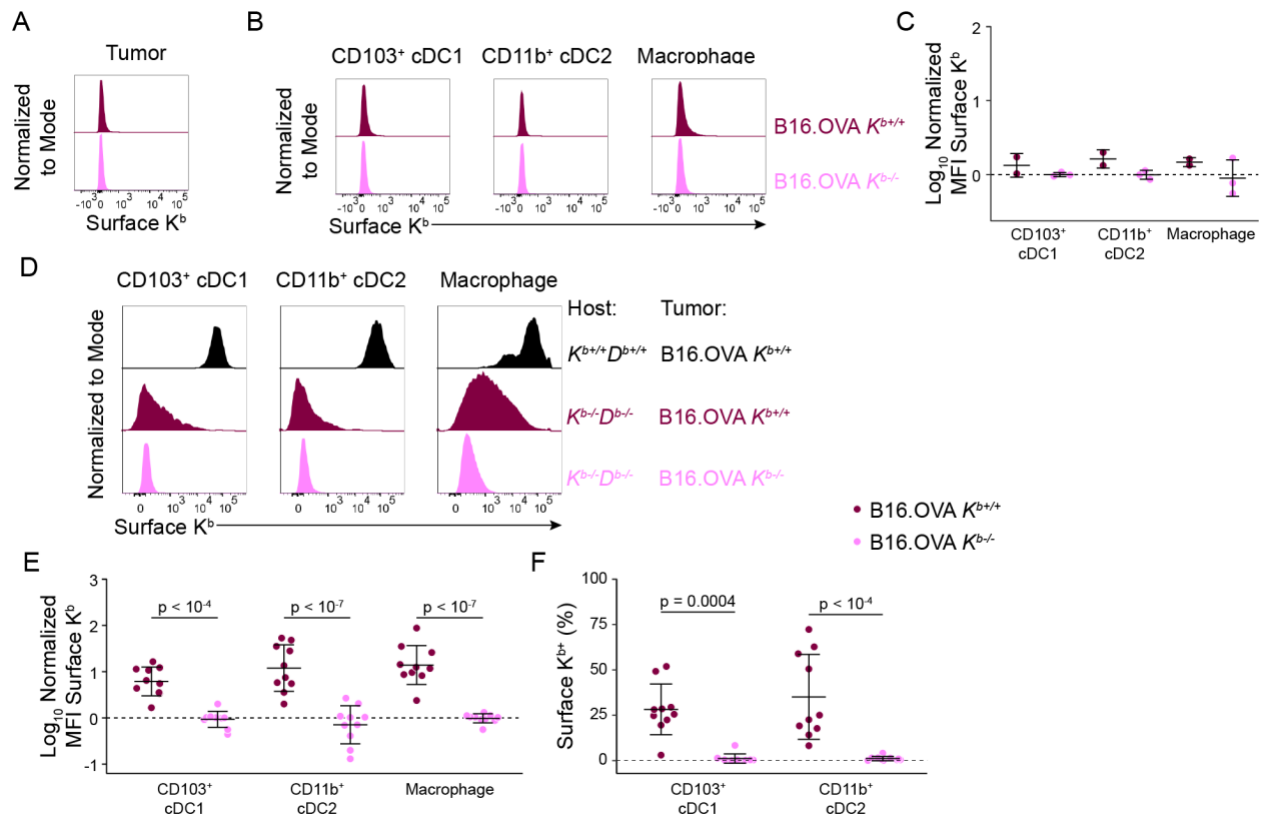

**Supplemental Figure S3 (Related to Figure 4): Acquisition of B16.OVA-derived  $K^b$  molecules by APC populations in the tumor. A-C)  $K^{b-/-} D^{b-/-}$  mice bearing B16.OVA  $K^{b+/+}$  ( $n = 2$ ) or  $K^{b-/-}$  ( $n = 3$ ) tumors, which were analyzed for cell surface  $K^b$  expression at day 6-10. Surface staining for  $K^b$  is shown for tumor cells (A) and tumor-resident APCs (B). Quantified data are in (C). Data shown are from one experiment, representative of two independent experiments. D-F) B16.OVA  $K^{b+/+}$  and  $K^{b-/-}$  cells were pre-treated with IFN- $\gamma$  for 48 hr *in vitro* prior to inoculation into C57BL/6 or  $K^{b-/-} D^{b-/-}$  hosts ( $n = 10$  for each tumor). Representative flow cytometry histograms of  $K^b$  surface staining are shown on APCs (D). Data are quantified as mean fluorescence intensity (E) and percent  $K^{b+}$  (F). Data in (E) and (F) are pooled from three independent experiments, and all summary plots are depicted as mean  $\pm$  s.d. Statistical significance was determined by two-way ANOVA with post-hoc Tukey's HSD.**

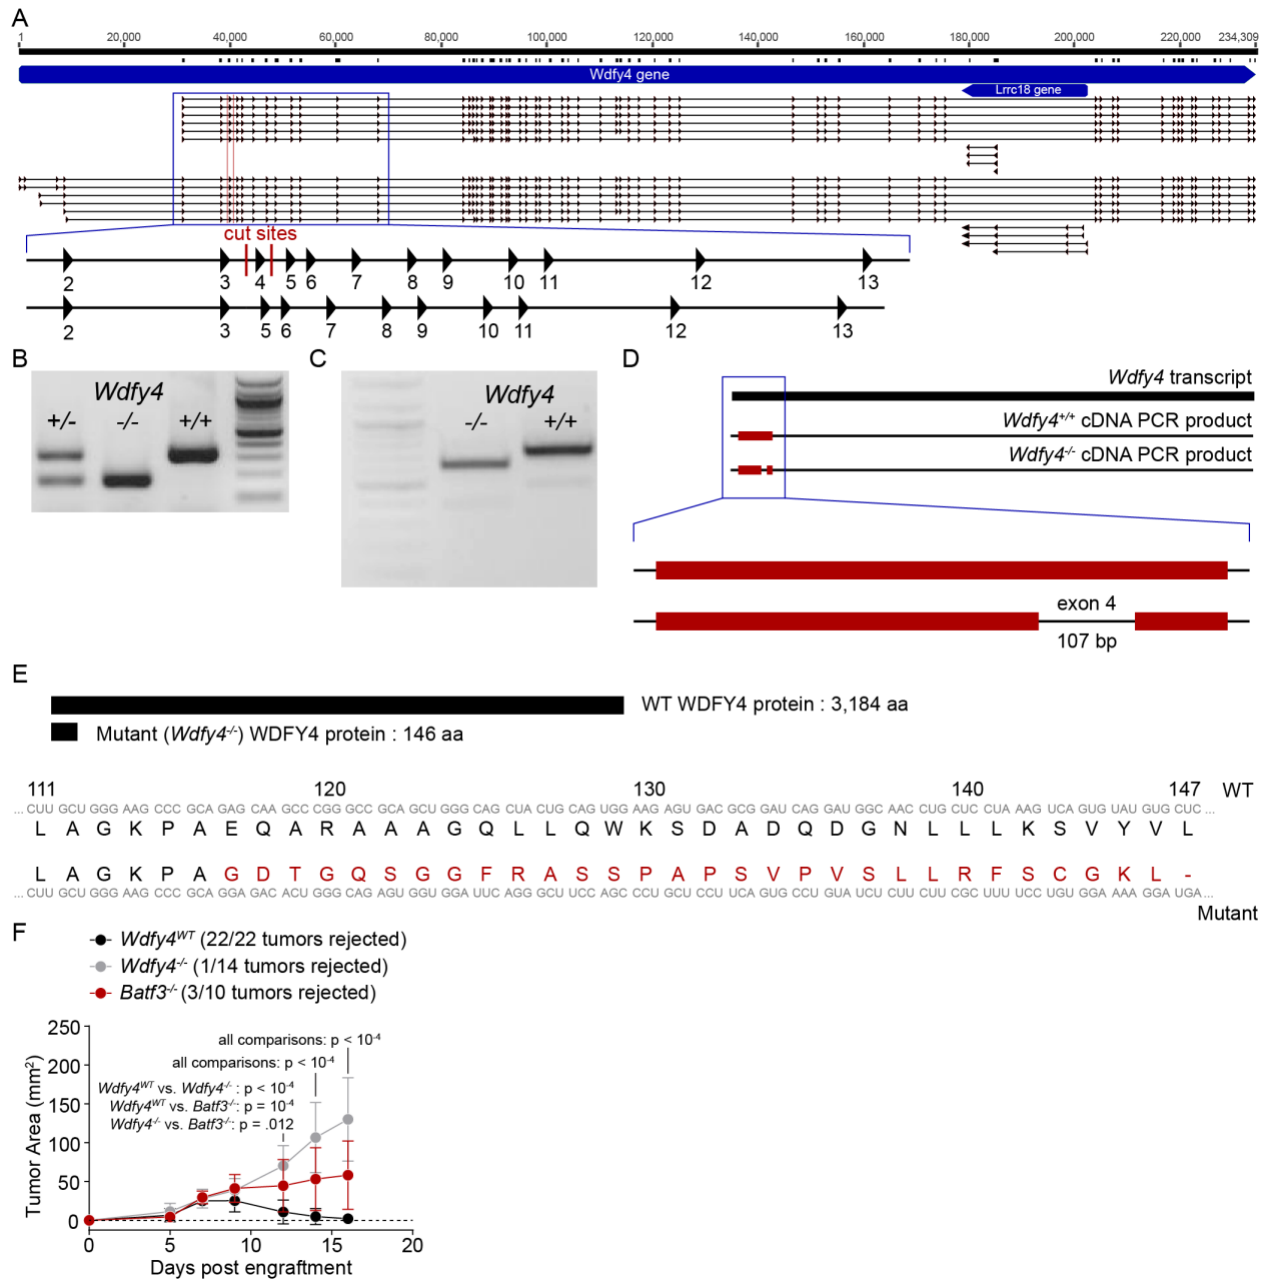

**Supplemental Figure S4 (Related to Figure 6): Generation of *Wdfy4*<sup>-/-</sup> mice. **A**) Illustration of the *Wdfy4* gene depicting the exons in different splice variants, with gRNA target sites indicated flanking exon 4. **B**) PCR amplification of genomic DNA surrounding exon 4, with a 144 bp excision in the *Wdfy4*<sup>-/-</sup> allele. **C and D**) RT-PCR amplification of a segment of the *Wdfy4* transcript containing exon 4 from *Wdfy4*<sup>+/+</sup> and *Wdfy4*<sup>-/-</sup> splenocytes, with a 107 bp deletion in the *Wdfy4*<sup>-/-</sup>**

allele. Alignment of the amplified cDNA fragments are shown in red. **E)** Illustration showing the length of proteins encoded by *Wdfy4*<sup>+/+</sup> and *Wdfy4*<sup>-/-</sup> alleles (to scale), along with RNA (grey) and translated amino acid sequences (wild-type and consensus sequences shown in black and the mutated region depicted in red) in the region containing the frameshift mutation and stop codon. **F)** Growth curves of 1969 tumors in littermate *Wdfy4*<sup>WT</sup> and *Wdfy4*<sup>-/-</sup> mice, as well as in *Batf3*<sup>-/-</sup> mice. Statistical significance was determined by two-way ANOVA with Sidak's post-hoc test for multiple comparisons. Data are depicted as mean  $\pm$  s.d. and pooled from two independent experiments.

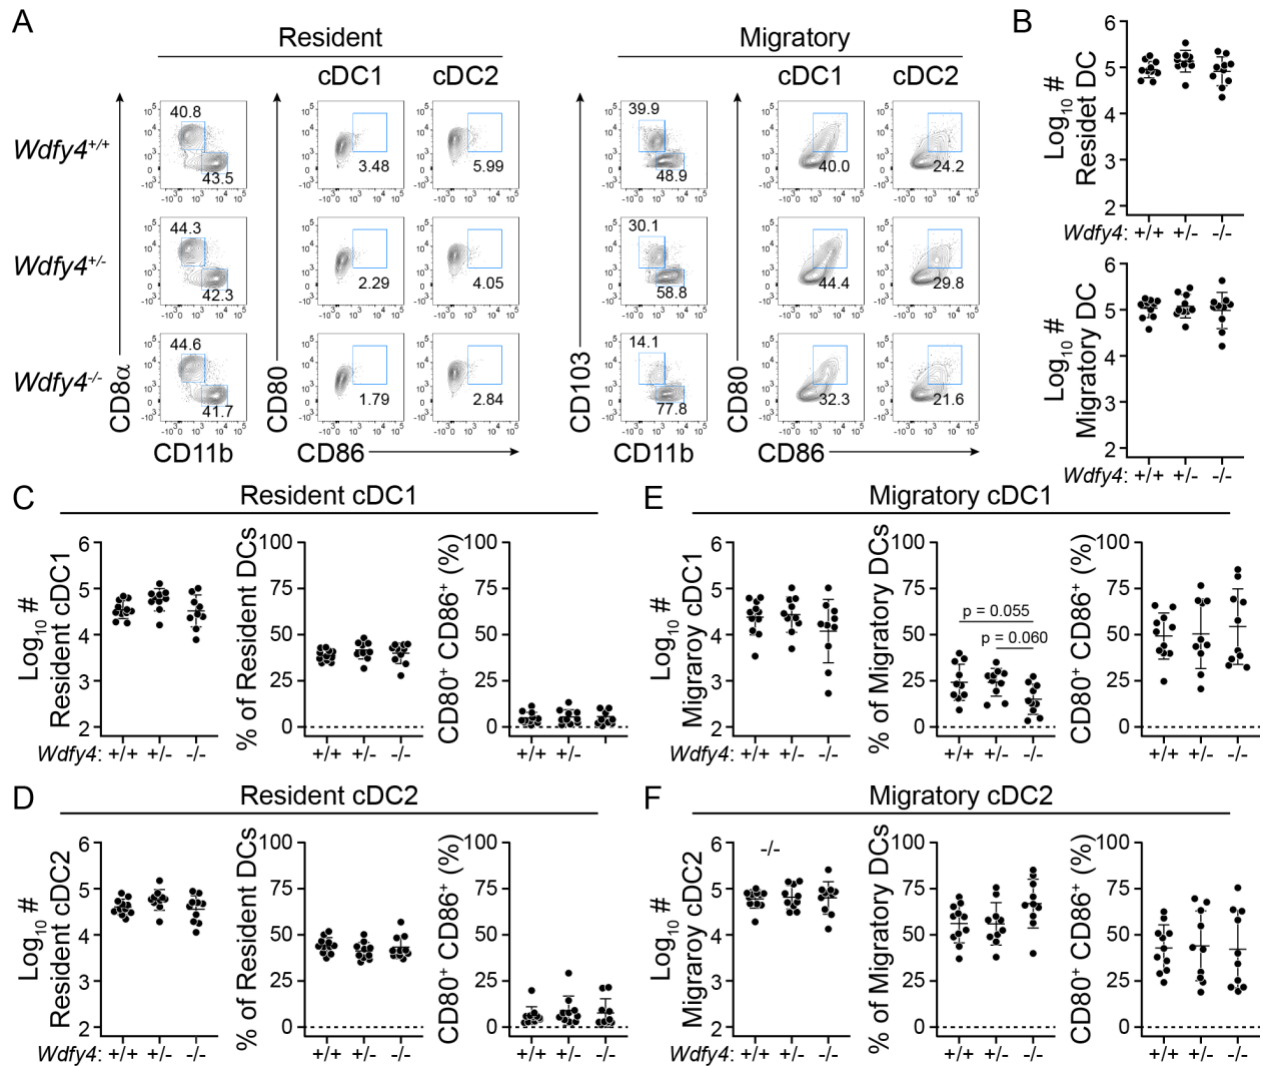

**Supplemental Figure S5 (Related to Figure 6): Normal cDC development and costimulatory molecule expression in cutaneous LNs of *Wdfy4*<sup>-/-</sup> mice. **A**) Representative flow cytometry plots of cDC populations in pooled cLNs of *Wdfy4*<sup>+/+</sup>, *Wdfy4*<sup>+/-</sup>, and *Wdfy4*<sup>-/-</sup> mice. **B**) Resident and migratory cDC numbers in pooled cLNs of *Wdfy4*<sup>+/+</sup> (n = 11), *Wdfy4*<sup>+/-</sup> (n = 10), and *Wdfy4*<sup>-/-</sup> (n = 10) mice. **C-F**) Quantification of numbers, frequency, and CD80/CD86 expression data for resident CD8α<sup>+</sup> cDC1 (C), resident CD11b<sup>+</sup> cDC2 (D), migratory CD103<sup>+</sup> cDC1 (E), and migratory CD11b<sup>+</sup> cDC2 (F) in pooled cLNs. Statistical significance was determined by one-way ANOVA with post-hoc Tukey's HSD test. Data are pooled from three independent experiments.**

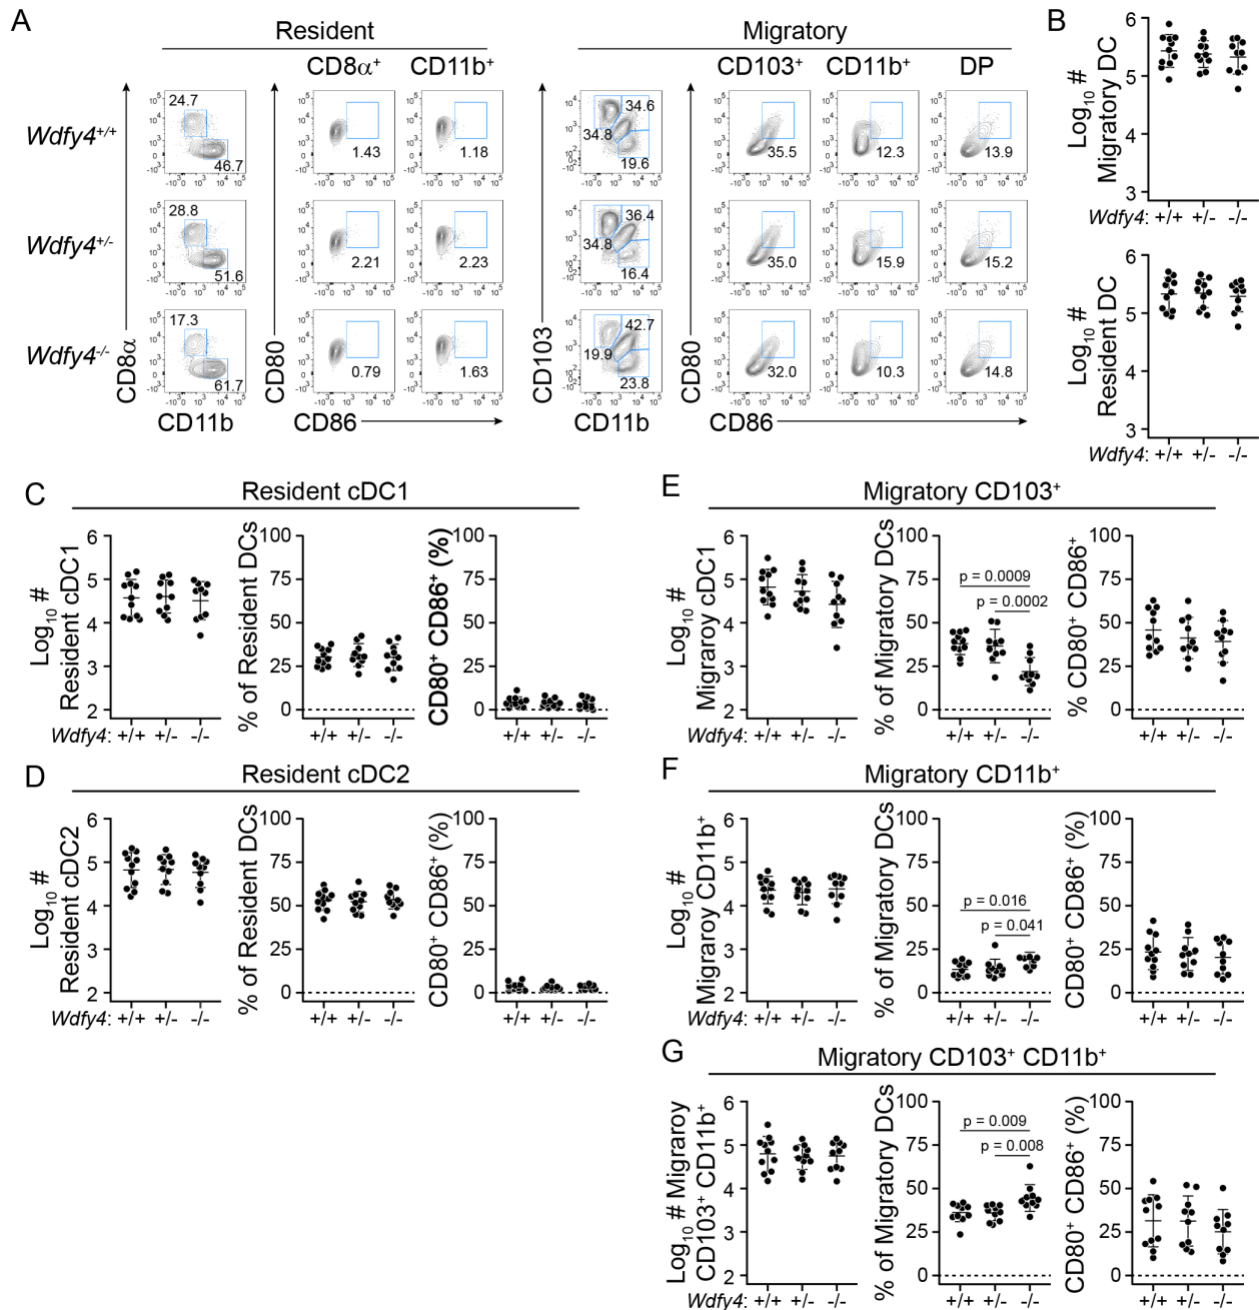

**Supplemental Figure S6 (Related to Figure 6): Reduced CD103<sup>+</sup> cDC1 populations in mesenteric LNs of *Wdfy4*<sup>-/-</sup> mice. **A**) Representative flow cytometry plots of cDC populations in pooled mesenteric LNs (mLNs) of *Wdfy4*<sup>+/+</sup>, *Wdfy4*<sup>+/-</sup>, and *Wdfy4*<sup>-/-</sup> mice. **B**) Resident and migratory cDC numbers in pooled mLNs of *Wdfy4*<sup>+/+</sup> (n = 11), *Wdfy4*<sup>+/-</sup> (n = 10), and *Wdfy4*<sup>-/-</sup> (n = 10) mice. **C-F**) Quantification of number, frequency, and CD80/CD86 expression data for resident**

CD8 $\alpha$ <sup>+</sup> cDC1 (C), resident CD11b<sup>+</sup> cDC2 (D), migratory CD103<sup>+</sup> cDC1 (E), and migratory CD11b<sup>+</sup> cDC2 (F), and migratory CD103<sup>+</sup> CD11b<sup>+</sup> cDC2 in pooled mLNs (G). Statistical significance was determined by one-way ANOVA with post-hoc Tukey's HSD. Data are pooled from three independent experiments.



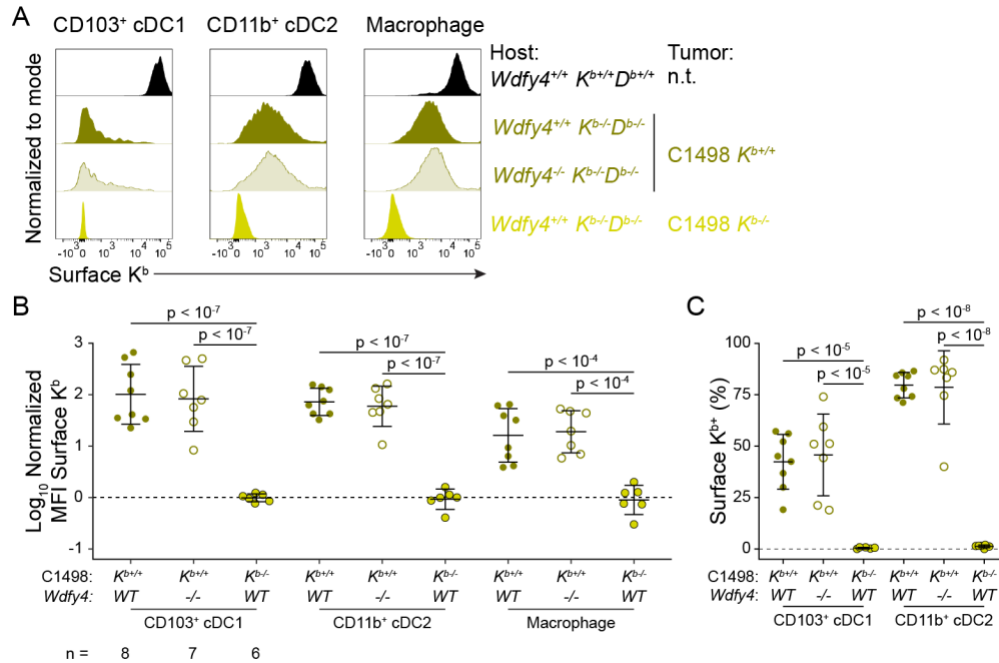

**Supplemental Figure S7 (Related to Figure 6): MHC-I cross-dressing occurs independently of WDFY4.** *Wdfy4*<sup>-/-</sup> *K<sup>b</sup>-/-* *D<sup>b</sup>-/-* and *Wdfy4*<sup>+/+</sup> *K<sup>b</sup>-/-* *D<sup>b</sup>-/-* mice were inoculated with C1498 *K<sup>b</sup>/+* or *K<sup>b</sup>-/-* cells. Tumor-resident APCs were analyzed for acquisition of C1498-derived K<sup>b</sup> molecules by surface antibody staining and flow cytometry. **A)** Representative flow cytometry histograms. **B)** Summary plot of normalized mean fluorescence intensity. **C)** Summary plot of percent K<sup>b</sup> DCs. The *Wdfy4*<sup>+/+</sup> group includes four *Wdfy4*<sup>+/+</sup> and four *Wdfy4*<sup>-/-</sup> mice. Data are pooled from two independent experiments. Statistical significance was determined by two-way ANOVA with post-hoc Tukey's HSD.
